# Supplementary material for: Doping of an organic molecular semiconductor by substitutional cocrystallization with a molecular n-dopant
Source: Royal Society of Chemistry journal article supplement (doi:10.1039/b610806g), 2006-11-14
Supplement: b610806g.pdf [file b610806g.pdf]

Supplementary Information for

**Doping of an Organic Molecular Semiconductor by  
Substitutional Cocrystallization with a Molecular n-Dopant**

**William W. Porter III and Thomas P. Vaid\***

Includes  $^1\text{H}$  NMR spectra of **2** and **2-H** quenched with  $\text{I}_2$  (Figure S1), cyclic voltammograms of **1** and **2** (Figures S2 and S3), and a graph of conductivity of doped **1** as a function of time (Figure S4).

Tris[p - (N,N -dimethylamino)phenyl]methyl radical with  
Tris[p - (N,N -dimethylamino)phenyl]methane side product in pyridine- $d_5$   
(\* denotes adventitious solvents absorbed from glovebox atmosphere)

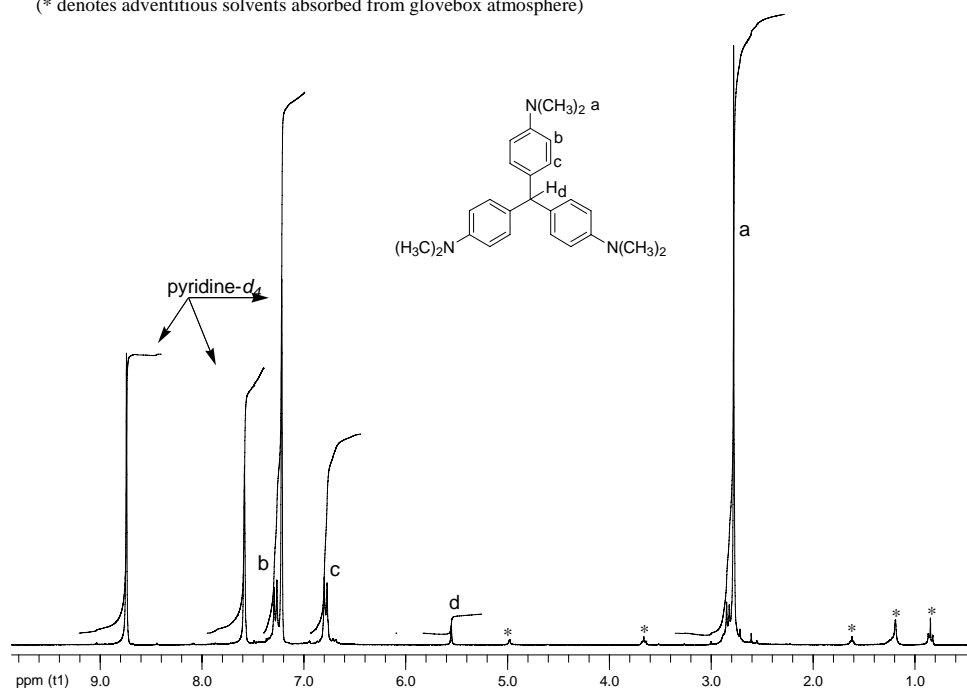

Tris[p - (N,N -dimethylamino)phenyl]methyl radical with  
Tris[p - (N,N -dimethylamino)phenyl]methane side product in pyridine- $d_5$   
after oxidation with  $\text{I}_2$

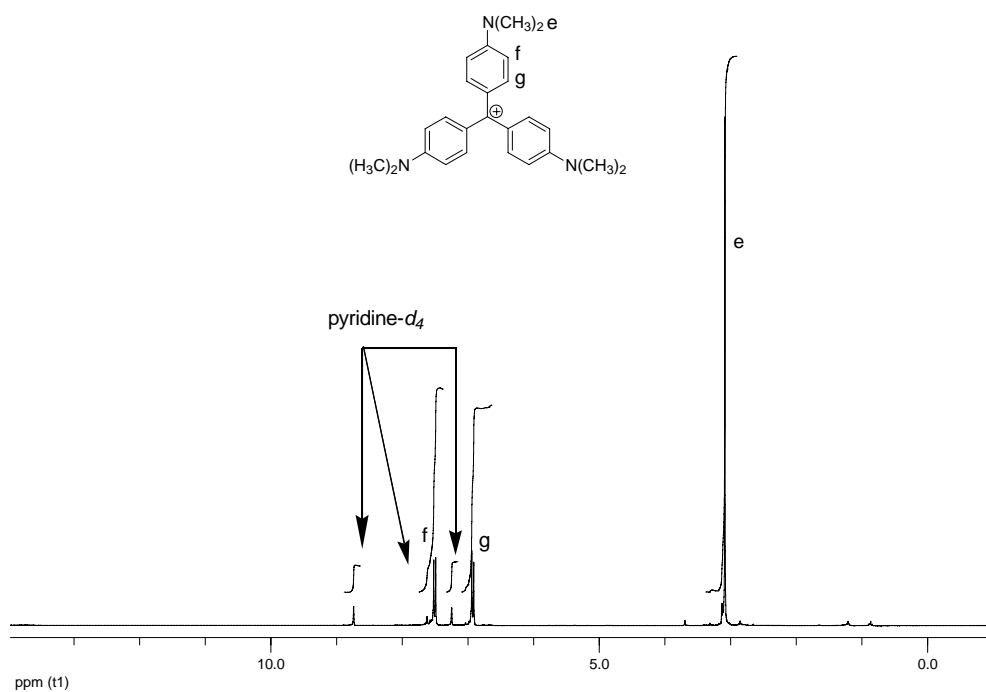

**Figure S1.**  $^1\text{H}$  NMR of **2** (with 2-H impurity) before (top) and after (bottom) the addition of  $\text{I}_2$  to the NMR sample.

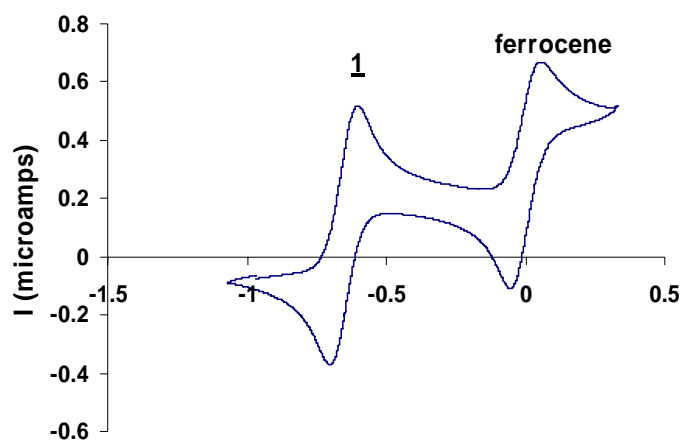

**Figure S2.** Cyclic voltammogram of **1** (and ferrocene) in THF.

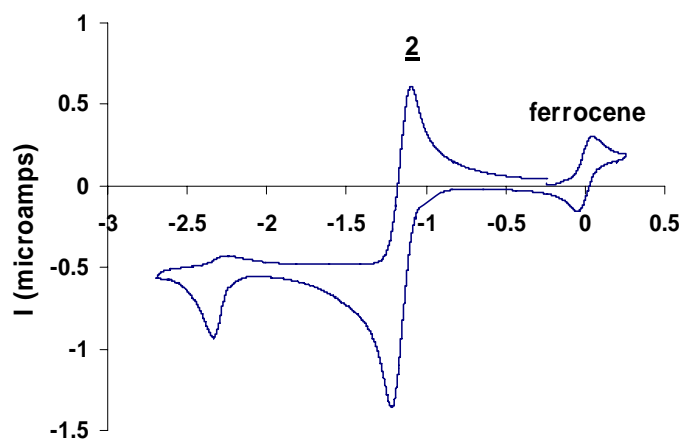

**Figure S3.** Cyclic voltammogram of **2** (and ferrocene) in THF.

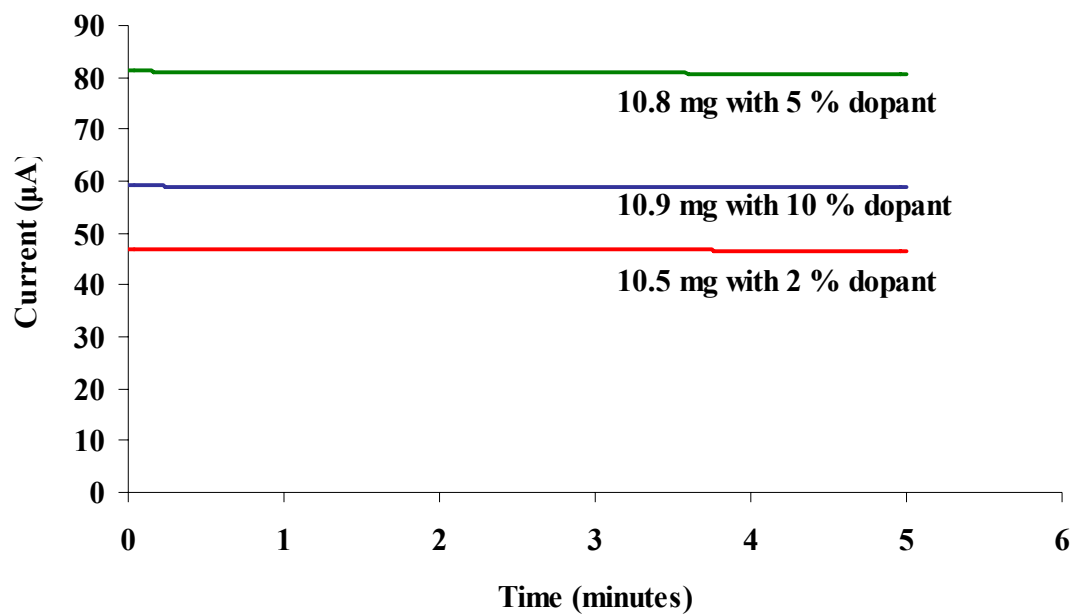

**Figure S4.** Potentiostatic measurements of **1** doped with **2** with a 4 V applied bias.
